# Supplementary material for: High prevalence of MRSA and multi-resistant gram-negative bacteria in refugees admitted to the hospital—But no hint of transmission
Source: PLoS One. 2018 May 31;13(5):e0198103. doi: 10.1371/journal.pone.0198103 (PMC5978789; doi:10.1371/journal.pone.0198103)
Supplement: S1 Table — (XLSX) [file pone.0198103.s001.xlsx]

## Sheet: Tabelle1
No in MST	Species	Collection date	Sequence Type	RP/NRP
001	MRSA	Sep-15	1	NRP
002	E.coli	Sep-15	131	NRP
003	E.coli	Sep-15	131	NRP
004	E.coli	Sep-15	131	NRP
005	MRSA	Sep-15	22	NRP
006	MRSA	Sep-15	1	NRP
007	E.coli	Sep-15	131	NRP
008	E.coli	Sep-15	131	NRP
009	MRSA	Sep-15	22	NRP
010	E.coli	Oct-15	131	NRP
011	MRSA	Oct-15	22	RP
012	MRSA	Oct-15	913	RP
013	E.coli	Oct-15	131	NRP
014	E.coli	Oct-15	6338	RP
015	MRSA	Oct-15	n.a.	RP
016	MRSA	Oct-15	30	RP
017	E.coli	Oct-15	131	RP
018	MRSA	Oct-15	1	RP
019	E.coli	Nov-15	131	NRP
020	MRSA	Nov-15	1	RP
021	E.coli	Nov-15	131	NRP
022	MRSA	Nov-15	398	NRP
023	E.coli	Nov-15	10	RP
024	MRSA	Nov-15	22	RP
025	E.coli	Nov-15	131	RP
026	E.coli	Nov-15	131	RP
027	E.coli	Nov-15	131	NRP
028	MRSA	Nov-15	1	NRP
029	E.coli	Nov-15	10	RP
030	E.coli	Nov-15	131	NRP
031	MRSA	Dec-15	1	NRP
032	MRSA	Dec-15	45	RP
033	K. pneumoniae	Dec-15	16	RP
034	MRSA	Dec-15	1	RP
035	MRSA	Dec-15	22	RP
036	E.coli	Dec-15	3873	RP
037	E.coli	Dec-15	6335	RP
038	E.coli	Dec-15	131	RP
039	K. pneumoniae	Dec-15	397	RP
040	E.coli	Dec-15	131	RP
041	MRSA	Dec-15	22	RP
042	MRSA	Dec-15	88	RP
043	E.coli	Dec-15	405	NRP
044	MRSA	Jan-16	6	RP
045	E.coli	Jan-16	405	RP
046	E.coli	Jan-16	131	NRP
047	E.coli	Jan-16	131	RP
048	MRSA	Jan-16	1	NRP
049	E.coli	Jan-16	131	NRP
050	MRSA	Jan-16	398	RP
051	MRSA	Jan-16	22	NRP
052	E.coli	Jan-16	648	NRP
053	E.coli	Feb-16	131	NRP
054	E.coli	Feb-16	648	RP
055	E.coli	Feb-16	131	NRP
056	MRSA	Feb-16	1	RP
057	E.coli	Feb-16	131	NRP
058	E.coli	Feb-16	131	NRP
059	E.coli	Feb-16	131	NRP
060	MRSA	Feb-16	22	NRP
061	E.coli	Feb-16	131	NRP
062	MRSA	Feb-16	22	RP
063	MRSA	Feb-16	6	RP
064	E.coli	Feb-16	14	RP
065	MRSA	Feb-16	5	RP
066	MRSA	Feb-16	6	RP
067	MRSA	Mar-16	22	RP
068	E.coli	Mar-16	648	NRP
069	E.coli	Mar-16	131	NRP
070	E.coli	Mar-16	131	NRP
071	MRSA	Mar-16	22	RP
072	E.coli	Mar-16	405	RP
073	MRSA	Mar-16	913	NRP
074	E.coli	Mar-16	131	NRP
075	K. pneumoniae	Mar-16	138	RP
076	MRSA	Mar-16	1	NRP
077	MRSA	Mar-16	398	NRP
078	E.coli	Mar-16	131	NRP
079	E.coli	Apr-16	n.a.	NRP
080	E.coli	Apr-16	131	NRP
081	E.coli	Apr-16	131	NRP
082	E.coli	Apr-16	131	NRP
083	MRSA	Apr-16	6	RP
084	E.coli	Apr-16	131	NRP
085	MRSA	Apr-16	1	NRP
086	MRSA	Apr-16	1	NRP
087	MRSA	Apr-16	22	RP
088	MRSA	Apr-16	398	NRP
089	MRSA	May-16	1	NRP
090	E.coli	May-16	131	NRP
091	E.coli	May-16	131	NRP
092	E.coli	May-16	131	NRP
093	MRSA	May-16	97	NRP
094	E.coli	May-16	131	NRP
095	E.coli	May-16	131	NRP
096	MRSA	May-16	2626	RP
097	MRSA	May-16	30	RP
098	MRSA	May-16	1	NRP
099	E.coli	May-16	131	NRP
100	MRSA	May-16	1	NRP
101	MRSA	May-16	22	NRP
102	E.coli	Jun-16	131	NRP
103	MRSA	Jun-16	97	RP
104	MRSA	Jun-16	1	NRP
105	MRSA	Jun-16	6	NRP
106	E.coli	Jun-16	131	NRP
107	E.coli	Jun-16	131	NRP
108	MRSA	Jun-16	30	RP
109	E.coli	Jun-16	131	NRP
110	E.coli	Jun-16	131	RP
111	K. pneumoniae	Jun-16	16	NRP
112	MRSA	Jun-16	398	NRP
113	E.coli	Jun-16	131	RP
114	MRSA	Jul-16	398	NRP
115	E.coli	Jul-16	131	NRP
116	MRSA	Jul-16	97	NRP
117	E.coli	Jul-16	648	NRP
118	MRSA	Jul-16	22	RP
119	MRSA	Jul-16	859	RP
120	MRSA	Jul-16	1	NRP
121	E.coli	Jul-16	131	NRP
122	E.coli	Jul-16	n.a.	NRP
123	E.coli	Jul-16	131	NRP
124	E.coli	Jul-16	131	NRP
125	E.coli	Jul-16	648	RP
126	MRSA	Jul-16	1	RP
127	E.coli	Aug-16	131	NRP
128	MRSA	Aug-16	1	NRP
129	E.coli	Aug-16	131	NRP
130	E.coli	Aug-16	131	NRP
131	E.coli	Aug-16	405	RP
132	MRSA	Aug-16	1	NRP
133	MRSA	Aug-16	88	RP
134	MRSA	Aug-16	22	RP
135	MRSA	Aug-16	22	NRP
136	E.coli	Aug-16	131	NRP
137	MRSA	Aug-16	1	NRP
138	MRSA	Aug-16	22	NRP
139	E.coli	Aug-16	131	NRP
140	E.coli	Sep-16	131	NRP
141	MRSA	Sep-16	398	NRP
142	E.coli	Sep-16	131	NRP
143	E.coli	Sep-16	131	NRP
144	E.coli	Sep-16	131	NRP
145	MRSA	Sep-16	239	RP
146	E.coli	Sep-16	131	NRP
147	E.coli	Sep-16	131	NRP
148	E.coli	Sep-16	131	NRP
149	MRSA	Sep-16	45	RP
150	E.coli	Sep-16	131	NRP
151	E.coli	Sep-16	131	NRP
152	MRSA	Sep-16	88	NRP
153	E.coli	Sep-16	n.a.	NRP
154	MRSA	Oct-16	1	NRP
155	E.coli	Oct-16	648	NRP
156	E.coli	Oct-16	131	NRP
157	E.coli	Oct-16	131	NRP
158	MRSA	Oct-16	97	NRP
159	E.coli	Oct-16	131	NRP
160	E.coli	Nov-16	131	NRP
161	E.coli	Nov-16	131	NRP
162	MRSA	Nov-16	22	NRP
163	E.coli	Nov-16	131	NRP
164	E.coli	Dec-16	405	NRP
165	E.coli	Dec-16	131	NRP
166	E.coli	Dec-16	131	NRP
167	E.coli	Dec-16	131	NRP
168	E.coli	Dec-16	131	NRP
169	E.coli	Dec-16	131	NRP
170	E.coli	Jan-17	131	NRP
171	MRSA	Jan-17	398	NRP
172	MRSA	Jan-17	22	NRP
173	E.coli	Jan-17	131	NRP
174	E.coli	Jan-17	131	NRP
175	MRSA	Jan-17	22	NRP
176	E.coli	Jan-17	131	NRP
177	E.coli	Jan-17	131	NRP
NRP: Non Refugee Patient
RP: Refugee Patient
MST: Minimum Spanning Tree
